# Supplementary material for: Oxygen isotope exchange between water and carbon dioxide in soilsis controlled by pH, nitrate availability and microbial biomassthrough links to carbonic anhydrase activity
Source: Copernicus journal article supplement (doi:10.5194/soil-2020-44), 2020-07-23
Supplement: Supplementary file 1 [file soil-2020-44-supplement.pdf]

## Supplementary information

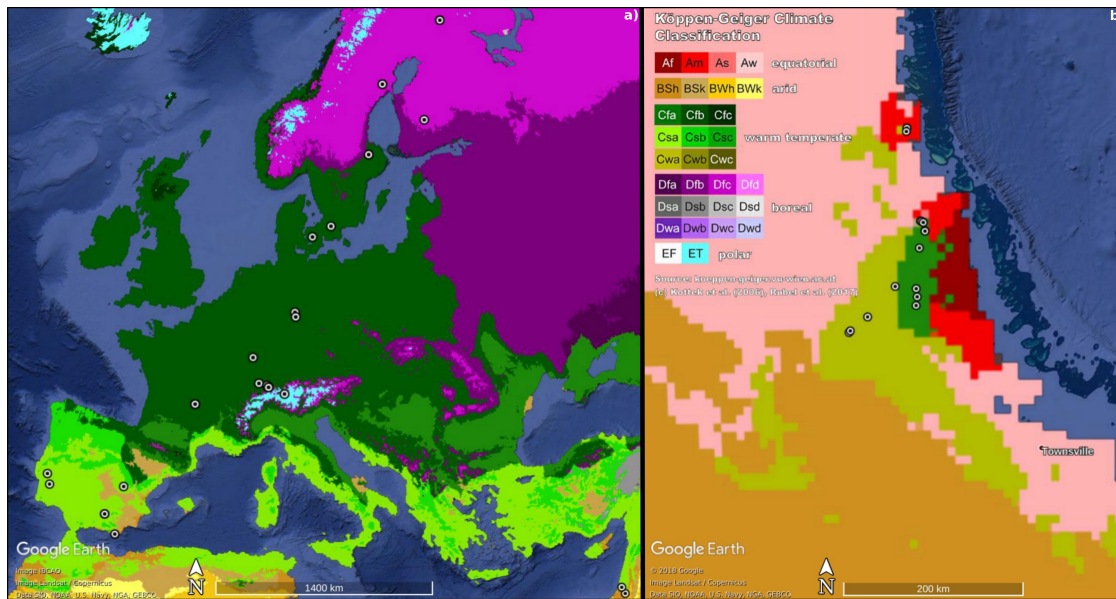

Figure S1: Location and climate of the 44 sites sampled; a) points indicating the location of the 27 sites in western Eurasian (EUR) within Subarctic (Dfc;  $n = 6$ ), Temperate oceanic (Cfb;  $n = 13$ ), Hot-summer Mediterranean (Csa;  $n = 7$ ) and Hot semi-arid (Bsh;  $n = 1$ ) climate zones, and b) points indicating the location of the 17 sites in north Queensland, Australia (AUS) within Tropical monsoon (Am;  $n = 3$ ), Humid subtropical (Cfa;  $n = 9$ ) and Monsoon-influenced humid subtropical (Cwa;  $n = 5$ ) climate zones.

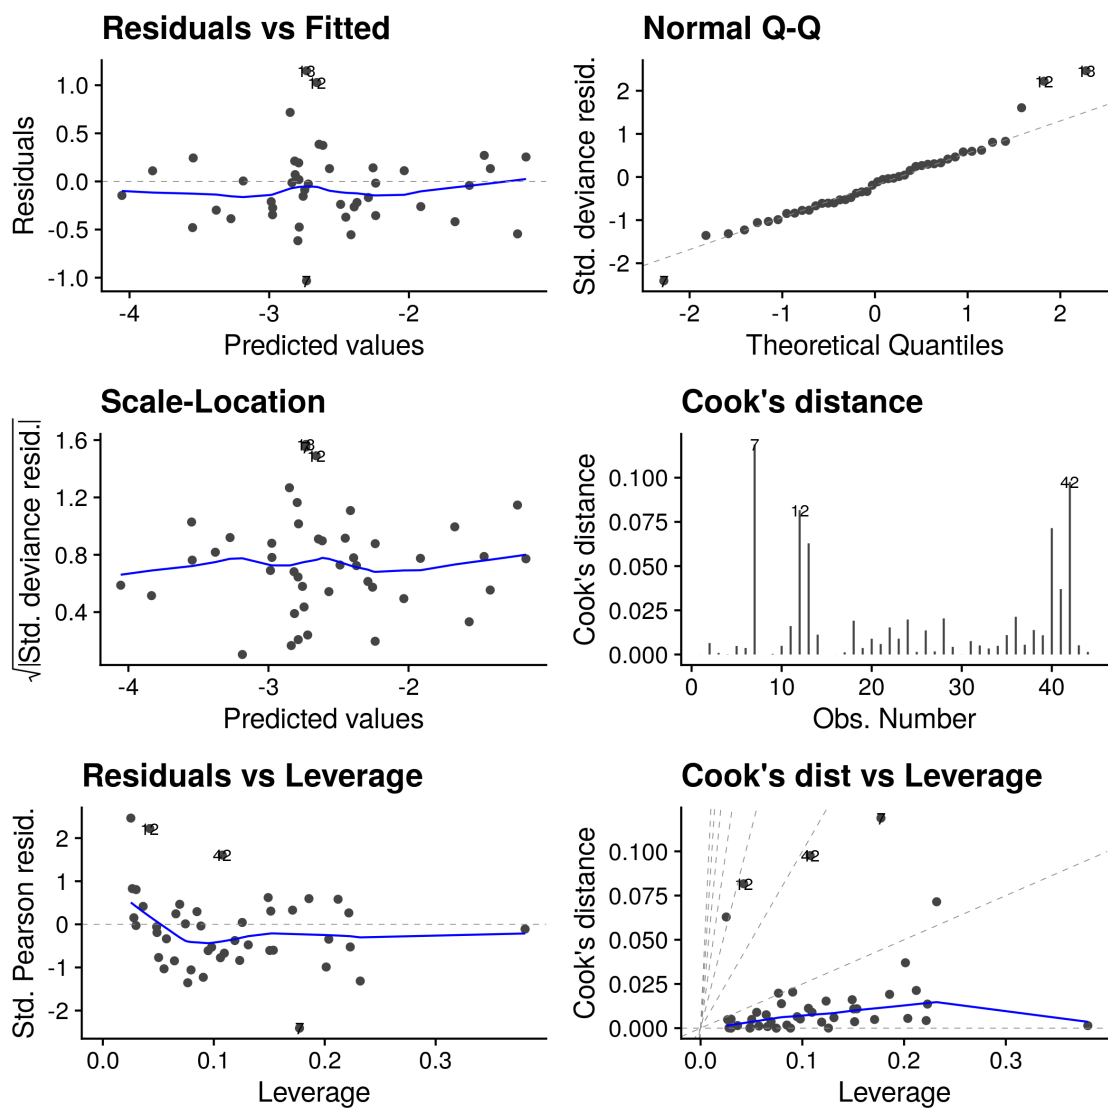

Figure S2: Diagnostic plots for the minimal adequate model describing variations in the exchange rate across the 44 sites sampled (Eq. 6).
